# Supplementary material
Source: PubMed Central journal article supplement (PMC6704730)
Supplement: jamaneurol-76-1466-s001.pdf [file jamaneurol-76-1466-s001.pdf]

## Supplementary Online Content

Pan Y, Elm JJ, Li H, et al. Outcomes associated with clopidogrel-aspirin use in minor stroke or transient ischemic attack: a pooled analysis of the Clopidogrel in High-Risk Patients With Acute Non-Disabling Cerebrovascular Events (CHANCE) and Platelet-Oriented Inhibition in New TIA and Minor Ischemic Stroke (POINT) Trials. *JAMA Neurol*. Published online August 19, 2019. doi:10.1001/jamaneurol.2019.2531

**eFigure 1.** Hazard ratios for the primary efficacy outcome in prespecified subgroups

**eFigure 2.** Sensitivity analysis of net clinical benefit considering minor hemorrhage

**eTable 1.** Characteristics of the CHANCE and POINT trials

**eTable 2.** Baseline characteristics of the patients

**eTable 3.** Time course distribution of major ischemic events and major hemorrhages by treatment assignment

This supplementary material has been provided by the authors to give readers additional information about their work.

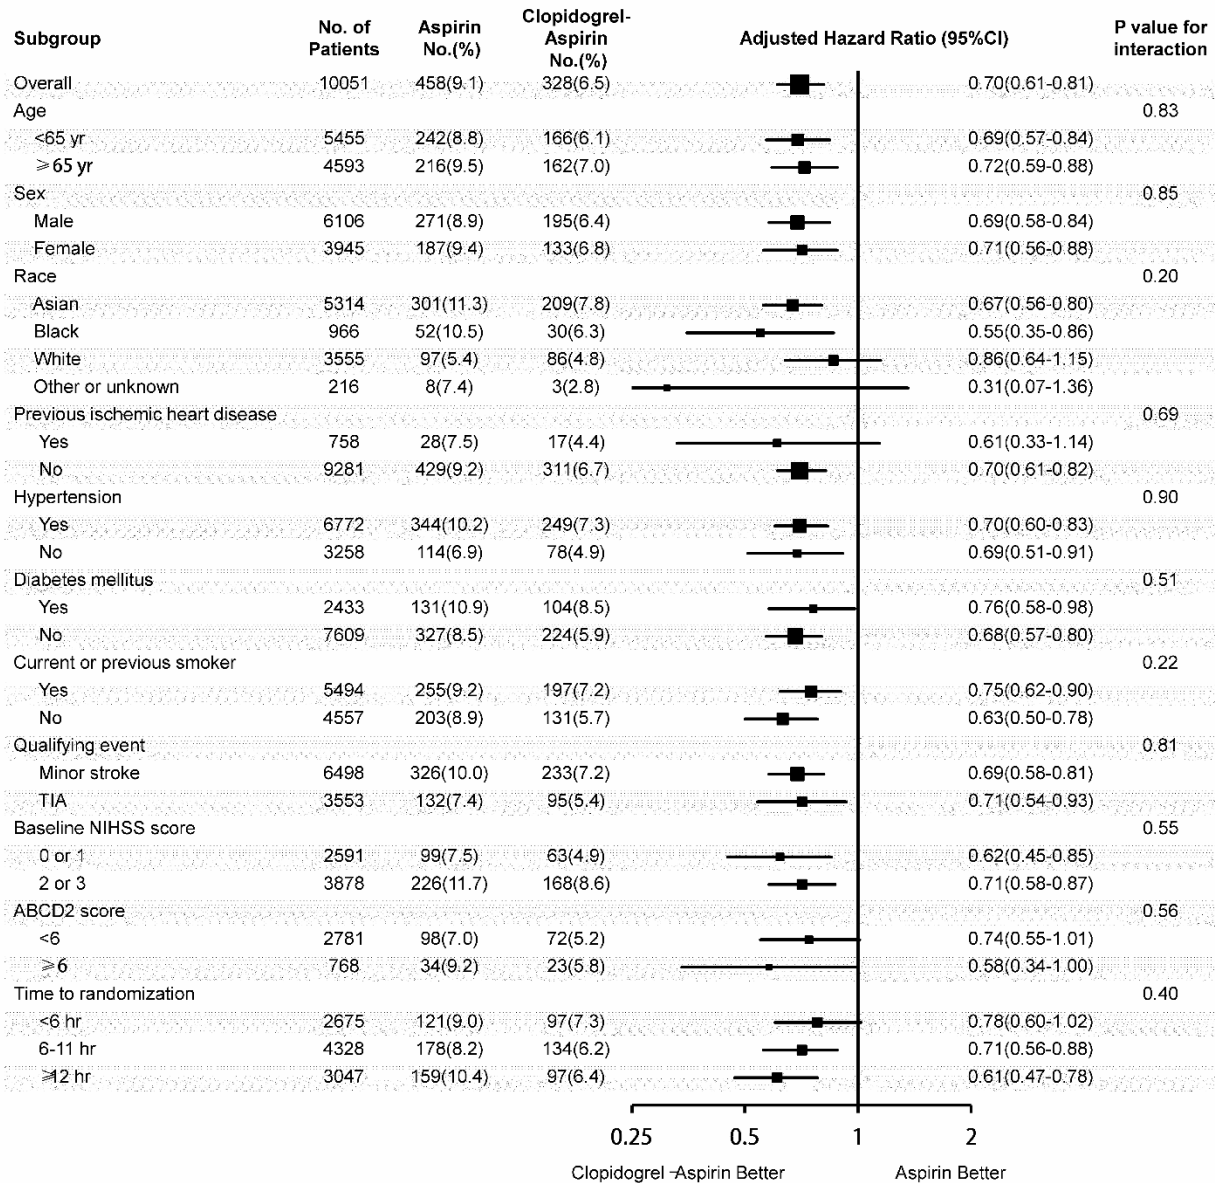

**Figure 1. Hazard ratios for the primary efficacy outcome in prespecified subgroups.** All the models were adjusted for the same covariates as the second model in primary analyses. n (%) referred to the number of subjects with a primary efficacy outcome event and the percent of the corresponding subgroup. Abbreviations: ABCD<sup>2</sup>, Age, Blood pressure, Clinical features, Duration of symptoms, and presence of Diabetes; NIHSS, NIH Stroke Scale.

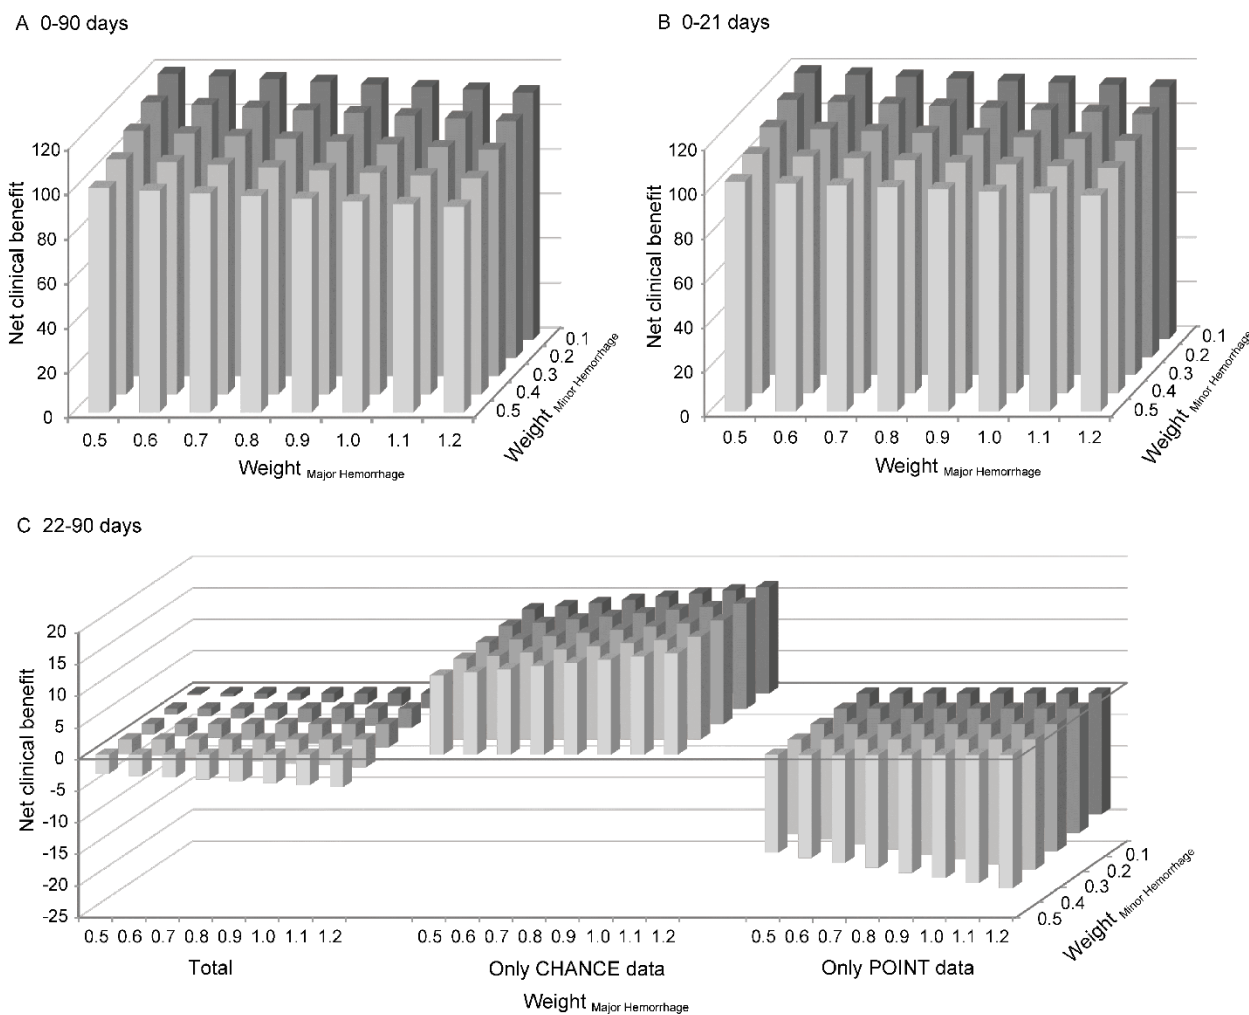

**eFigure 2. Sensitivity analysis of net clinical benefit considering minor hemorrhage.** Net clinical benefit was calculated as:  $\text{Net Benefit} = (\text{Major Ischemic Event}_{\text{Aspirin Group}} - \text{Major Ischemic Event}_{\text{Clopidogrel-Aspirin Group}}) - \text{Weight}_{\text{Major Hemorrhage}} \times (\text{Major Hemorrhage}_{\text{Clopidogrel-Aspirin Group}} - \text{Major Hemorrhage}_{\text{Aspirin Group}}) - \text{Weight}_{\text{Minor Hemorrhage}} \times (\text{Minor Hemorrhage}_{\text{Clopidogrel-Aspirin Group}} - \text{Minor Hemorrhage}_{\text{Aspirin Group}})$ . The weights account for the effects of a major ( $\text{Weight}_{\text{Major Hemorrhage}}$ ) or minor ( $\text{Weight}_{\text{Minor Hemorrhage}}$ ) hemorrhage compared with a major ischemic event. Major ischemic event included ischemic stroke, myocardial infarction, or death from ischemic vascular causes.

**eTable 1. Characteristics of the CHANCE and POINT trials**

| <b>Trial:</b>                     | <b>CHANCE</b>                                                                   | <b>POINT</b>                                                                   |
|-----------------------------------|---------------------------------------------------------------------------------|--------------------------------------------------------------------------------|
| Published year:                   | 2013                                                                            | 2018                                                                           |
| Study design:                     | Randomized, double-blind, placebo-controlled trial                              | Randomized, double-blind, placebo-controlled trial                             |
| Time of enrollment:               | From October 2009 to July 2012                                                  | From May 2010 to December 2017                                                 |
| Region of study sites:            | 114 sites in China                                                              | 269 sites in 10 countries in North America, Europe, Australia, and New Zealand |
| Sample size:                      | 5170                                                                            | 4881                                                                           |
| Study Population:                 |                                                                                 |                                                                                |
| Ethnicity:                        | 100% Asian                                                                      | 3.0% Asian; 75.0% White; 20.4% Black; 1.5% Other                               |
| Patients:                         | TIA (ABCD <sup>2</sup> ≥4): 27.9%;<br>Minor stroke (NIHSS≤3): 72.1%             | TIA (ABCD <sup>2</sup> ≥4): 43.2%;<br>Minor stroke (NIHSS≤3): 56.8%            |
| Time from onset to randomization: | ≤24 h                                                                           | ≤12 h                                                                          |
| Intervention group:               | CLP: d1: 300 mg; d2-d90: 75 mg/d;<br>ASA: d1: 75-300 mg; d2-d21: 75 mg/d        | CLP: d1: 600 mg; d2-d90: 75 mg/d;<br>ASA: d1-d90: 50-325 mg/d                  |
| Control group:                    | ASA: d1: 75-300 mg; d2-d21: 75 mg/d                                             | ASA: d1-d90: 50-325 mg/d                                                       |
| Time of outcome:                  | Day 90                                                                          | Day 90                                                                         |
| Primary efficacy outcome:         | Stroke: 8.2% vs. 11.7%;<br>HR: 0.68(0.57-0.81), p<0.001                         | Stroke+MI+Cardiovascular death: 5.0% vs. 6.5%;<br>HR: 0.75(0.59-0.95), p=0.02  |
| Secondary efficacy outcome:       | Stroke+MI+Cardiovascular death: 8.4% vs. 11.9%;<br>HR: 0.69(0.58-0.82), p<0.001 | Stroke: 4.8% vs. 6.4%;<br>HR: 0.74(0.58-0.94), p=0.01                          |
| Primary safety outcome:           | Moderate-to-Severe bleeding: 0.4% vs. 0.3%<br>HR: 0.84(0.30-2.31), p=0.73       | Major hemorrhage: 0.9% vs. 0.4%<br>HR: 2.32(1.10-4.87), p=0.02                 |

Abbreviations: ABCD<sup>2</sup>, Age, Blood pressure, Clinical features, Duration of symptoms, and presence of Diabetes; NIHSS, NIH Stroke Scale; CLP, clopidogrel; ASA, aspirin; MI, myocardial infarction; HR, hazard ratio; TIA, transient ischemic attack; d1, Day 1; d2-d90, Day 2- Day 90.

**eTable 2. Baseline characteristics of the patients**

| <b>Characteristic</b>                    | <b>Total<br/>(n=10051)</b> | <b>Aspirin<br/>(n=5035)</b> | <b>Clopidogrel-aspirin<br/>(n=5016)</b> | <b>p<br/>value</b> |
|------------------------------------------|----------------------------|-----------------------------|-----------------------------------------|--------------------|
| Age (yr), median (IQR)                   | 63.2(55.0-72.9)            | 63.0(55.0-72.7)             | 63.6(55.0-73.0)                         | 0.16               |
| Female, No. (%)                          | 3945(39.2)                 | 1996(39.6)                  | 1949(38.9)                              | 0.42               |
| Race, No. (%)                            |                            |                             |                                         | 0.94               |
| Asian                                    | 5314(52.9)                 | 2653(52.7)                  | 2661(53.1)                              |                    |
| Black                                    | 966(9.6)                   | 493(9.8)                    | 473(9.4)                                |                    |
| White                                    | 3555(35.4)                 | 1781(35.4)                  | 1774(35.4)                              |                    |
| Other or unknown                         | 216(2.1)                   | 108(2.1)                    | 108(2.2)                                |                    |
| Medical history, No. (%)                 |                            |                             |                                         |                    |
| Congestive heart failure                 | 206/10044(2.1)             | 100/5032(2.0)               | 106/5012(2.1)                           | 0.65               |
| Known atrial fibrillation or flutter     | 145/10037(1.4)             | 66/5029(1.3)                | 79/5008(1.6)                            | 0.27               |
| Ischemic heart disease                   | 758/10039(7.6)             | 373/5029(7.4)               | 385/5010(7.7)                           | 0.61               |
| Hypertension                             | 6772/10030(67.5)           | 3363/5023(67.0)             | 3409/5007(68.1)                         | 0.23               |
| Diabetes mellitus                        | 2433/10042(24.2)           | 1205/5033(23.9)             | 1228/5009(24.5)                         | 0.50               |
| Current or previous smoker, No. (%)      | 5494(54.7)                 | 2765(54.9)                  | 2729(54.4)                              | 0.61               |
| Qualifying event, No. (%)                |                            |                             |                                         | 1.00               |
| Minor stroke                             | 6498(64.7)                 | 3255(64.6)                  | 3243(64.7)                              |                    |
| TIA                                      | 3553(35.3)                 | 1780(35.4)                  | 1773(35.3)                              |                    |
| Median qualifying neurologic score (IQR) |                            |                             |                                         |                    |
| NIHSS for ischemic stroke                | 2(1-3)                     | 2(1-3)                      | 2(1-3)                                  | 0.30               |
| ABCD <sup>2</sup> for TIA                | 5(4-5)                     | 5(4-5)                      | 5(4-5)                                  | 0.45               |
| Time to randomization, No. (%)           |                            |                             |                                         | 0.95               |
| <6 hr                                    | 2675/10050(26.6)           | 1346/5035(26.7)             | 1329/5015(26.5)                         |                    |
| 6-11 hr                                  | 4328/10050(43.1)           | 2161/5035(42.9)             | 2167/5015(43.2)                         |                    |
| ≥12 hr                                   | 3047/10050(30.3)           | 1528/5035(30.4)             | 1519/5015(30.3)                         |                    |
| Concomitant medication, No.(%)           |                            |                             |                                         |                    |
| Anti-hypertensive agents <sup>a</sup>    | 3506/7683(45.6)            | 1735/3862 (44.9)            | 1771/3821 (46.3)                        | 0.21               |
| Lipid-lowering agents                    | 5927/9878(60.0)            | 2961/4957(59.7)             | 2966/4921(60.3)                         | 0.58               |

Abbreviations: IQR, interquartile range; NIHSS, NIH Stroke Scale; ABCD<sup>2</sup>, Age, Blood pressure, Clinical features, Duration of symptoms, and presence of Diabetes; TIA, transient ischemic attack.

<sup>a</sup> Antihypertensive treatment was not collected in POINT before 2014.

**eTable 3. Time course distribution of major ischemic events and major hemorrhages by treatment assignment**

| Outcome               | Treatment assignment | Total | 1 <sup>st</sup> week | 2 <sup>nd</sup> week | No. of events<br>3 <sup>rd</sup> week | 4 <sup>th</sup> week | 5 <sup>th</sup> week | 6 <sup>th</sup> week-day 90 |
|-----------------------|----------------------|-------|----------------------|----------------------|---------------------------------------|----------------------|----------------------|-----------------------------|
| Major ischemic events | ASA (n=5035)         | 458   | 330                  | 36                   | 21                                    | 10                   | 5                    | 56                          |
|                       | CLP+ASA(n=5016)      | 328   | 217                  | 30                   | 14                                    | 10                   | 9                    | 48                          |
|                       | Difference           | 130   | 113                  | 6                    | 7                                     | 0                    | -4                   | 8                           |
| Major Hemorrhage      | ASA (n=5035)         | 18    | 4                    | 2                    | 1                                     | 1                    | 1                    | 9                           |
|                       | CLP+ASA(n=5016)      | 30    | 10                   | 4                    | 2                                     | 1                    | 3                    | 10                          |
|                       | Difference           | -12   | -6                   | -2                   | -1                                    | 0                    | -2                   | -1                          |

Abbreviations: ASA, aspirin; CLP, clopidogrel.
